# Supplementary material
Source: PubMed Central journal article supplement (PMC4451962)

**Supplemental Figure S1** – Flow Chart describing computational docking of the Life Chemicals, Inc. small molecule library to the head-to-head prone model of tetrameric EGFR.

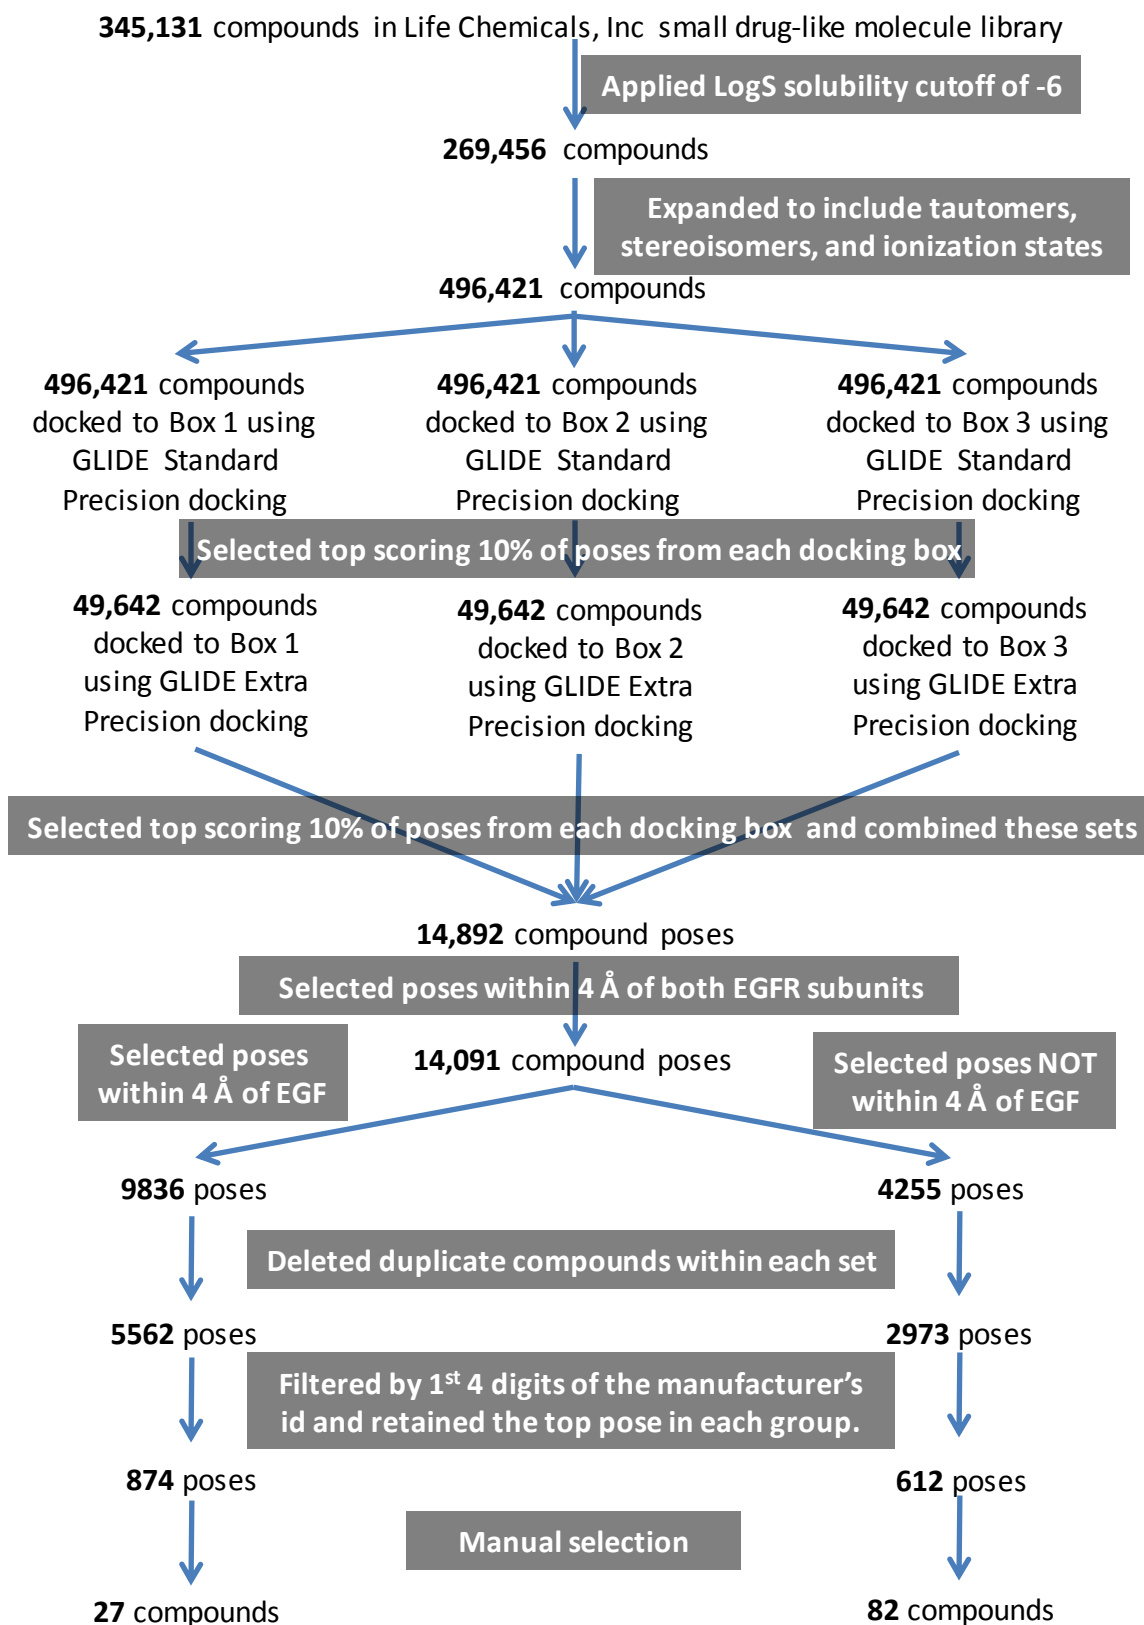

Supplement: 12885_2015_1415_MOESM5_ESM.pdf [file 12885_2015_1415_MOESM5_ESM.pdf]
