# Supplementary material
Source: PubMed Central journal article supplement (PMC4451962)
Supplement: 12885_2015_1415_MOESM6_ESM.pdf [file 12885_2015_1415_MOESM6_ESM.pdf]

| Structure                                                                                                                                                   | IDNUMBER   | MW      | Glide XP G score |
|-------------------------------------------------------------------------------------------------------------------------------------------------------------|------------|---------|------------------|
| 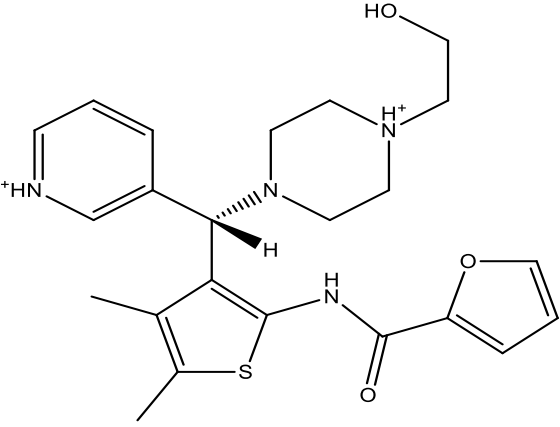 <p data-bbox="735 617 871 641"><chem>C_{23}H_{30}N_4O_3S^+_2</chem></p>   | F1396-0119 | 440.559 | -10.3163         |
|  <p data-bbox="735 909 871 933"><chem>C_{22}H_{20}N_4O_4S</chem></p>      | F5015-0190 | 436.484 | -10.227          |
|  <p data-bbox="735 1437 871 1461"><chem>C_{20}H_{35}N_5O_2^+_2</chem></p> | F2762-0281 | 375.513 | -9.69593         |

|                                                                                                                                                                                                                                                                                                                                                                                                                                                                                                                                                                               |            |         |          |
|-------------------------------------------------------------------------------------------------------------------------------------------------------------------------------------------------------------------------------------------------------------------------------------------------------------------------------------------------------------------------------------------------------------------------------------------------------------------------------------------------------------------------------------------------------------------------------|------------|---------|----------|
| 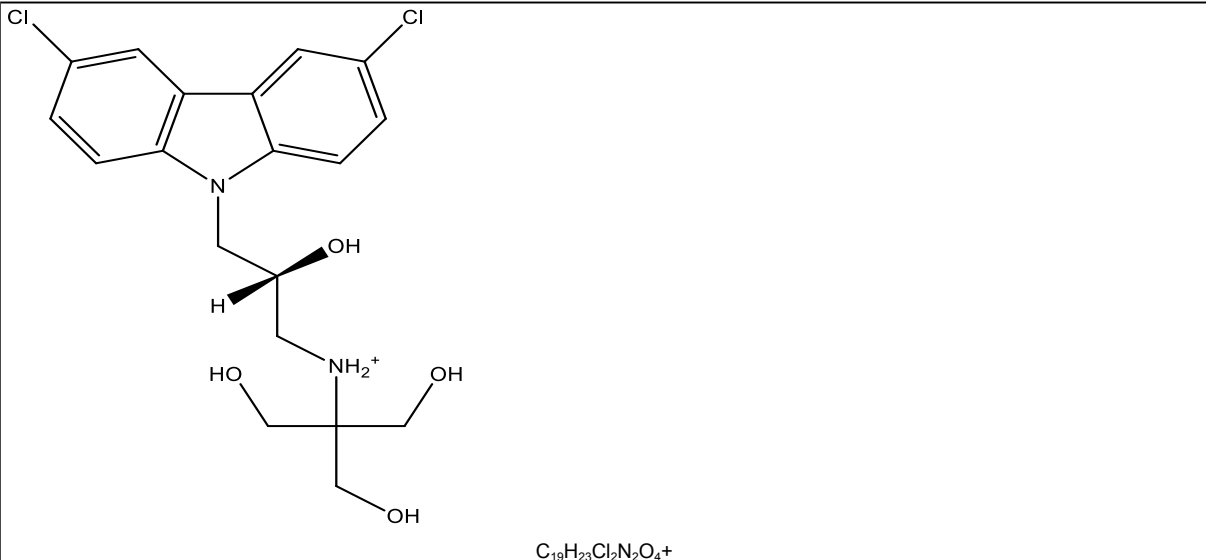 <p>Chemical structure of a bis-chlorinated indole derivative. The indole ring system has chlorine atoms at the 2 and 7 positions. The nitrogen atom of the indole is attached to a chiral carbon atom. This carbon atom is also bonded to a hydrogen atom (pointing left), a hydroxyl group (pointing up-right), and a 2-aminoethanol chain. The amino group is protonated (NH<sub>2</sub><sup>+</sup>).</p>                                                                               |            |         |          |
|  <p>Chemical structure of a complex heterocyclic molecule. It features a piperazine ring with a protonated nitrogen (NH<sup>+</sup>) and a hydroxyethyl group. The piperazine ring is connected to a pyrimidopyrimidine core. The core has a chiral center with a hydroxyl group (pointing up-right) and a hydrogen atom (pointing left). The core also has a methyl group (CH<sub>3</sub>) and a 2-phenylethoxy group. The pyrimidine ring has a protonated nitrogen (H<sup>+</sup>).</p> | F3255-0148 | 413.3   | -9.59794 |
| <p><math>C_{19}H_{23}Cl_2N_2O_4^+</math></p>                                                                                                                                                                                                                                                                                                                                                                                                                                                                                                                                  |            |         |          |
| <p><math>C_{21}H_{30}N_6O_5^+</math></p>                                                                                                                                                                                                                                                                                                                                                                                                                                                                                                                                      | F1144-0088 | 444.489 | -9.40578 |

|                                                                                                                                                                                                                                                                                                                                                                                                                                                                                                                                     |            |         |          |
|-------------------------------------------------------------------------------------------------------------------------------------------------------------------------------------------------------------------------------------------------------------------------------------------------------------------------------------------------------------------------------------------------------------------------------------------------------------------------------------------------------------------------------------|------------|---------|----------|
| 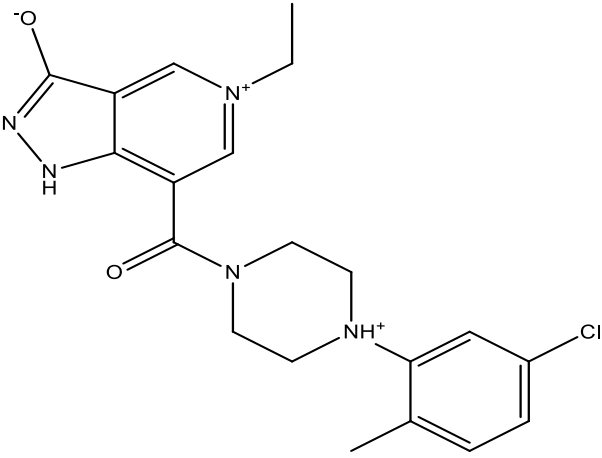 <p>Chemical structure of a pyridine derivative. The pyridine ring is substituted with an ethyl group on the nitrogen (N<sup>+</sup>), a benzimidazole ring at the 2-position, and a piperazine ring at the 4-position. The piperazine ring is further substituted with a 3-chloro-4-methylphenyl group on its secondary nitrogen (NH<sup>+</sup>).</p> <p><chem>C20H23ClN5O2+</chem></p>                                                          | F5609-0376 | 399.879 | -9.35411 |
|  <p>Chemical structure of a sulfonamide derivative. It features a piperazine ring (NH<sup>+</sup>) attached to a chiral carbon atom. This carbon is also bonded to a 4-methoxyphenyl group and a hydrogen atom (shown with a dashed bond). The chiral carbon is further connected to a methylene group, which is linked to a sulfonamide group (-NH-SO<sub>2</sub>-) attached to a 3,5-dimethoxyphenyl ring.</p> <p><chem>C21H28N2O6S+</chem></p> | F2880-3762 | 436.522 | -9.31757 |

|                                                                                                                                                           |            |         |          |
|-----------------------------------------------------------------------------------------------------------------------------------------------------------|------------|---------|----------|
| 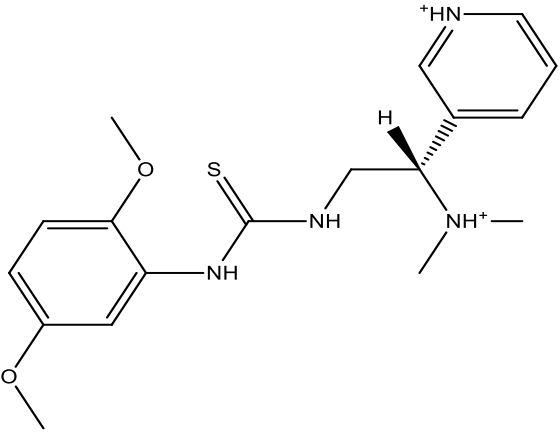 <p style="text-align: center;"><math>C_{18}H_{26}N_4O_2S^+</math></p>   | F0638-0019 | 360.473 | -9.23781 |
|  <p style="text-align: center;"><math>C_{16}H_{16}F_2N_3O_3^+</math></p> | F2721-0534 | 335.31  | -9.15392 |
|  <p style="text-align: center;"><math>C_{19}H_{25}N_4O_4^+</math></p>   | F5253-0138 | 404.483 | -9.09713 |

|                                                                                                                                                            |            |         |          |
|------------------------------------------------------------------------------------------------------------------------------------------------------------|------------|---------|----------|
|  <p style="text-align: center;"><math>C_{19}H_{18}N_4O_2S^+_2</math></p> | F5269-0096 | 364.421 | -9.04544 |
|  <p style="text-align: center;"><math>C_{17}H_{20}FN_3^+_2</math></p>     | F2184-0148 | 283.348 | -9.00998 |
|  <p style="text-align: center;"><math>C_{23}H_{22}N_4O_5^+</math></p>    | F3323-0523 | 432.435 | -8.99051 |

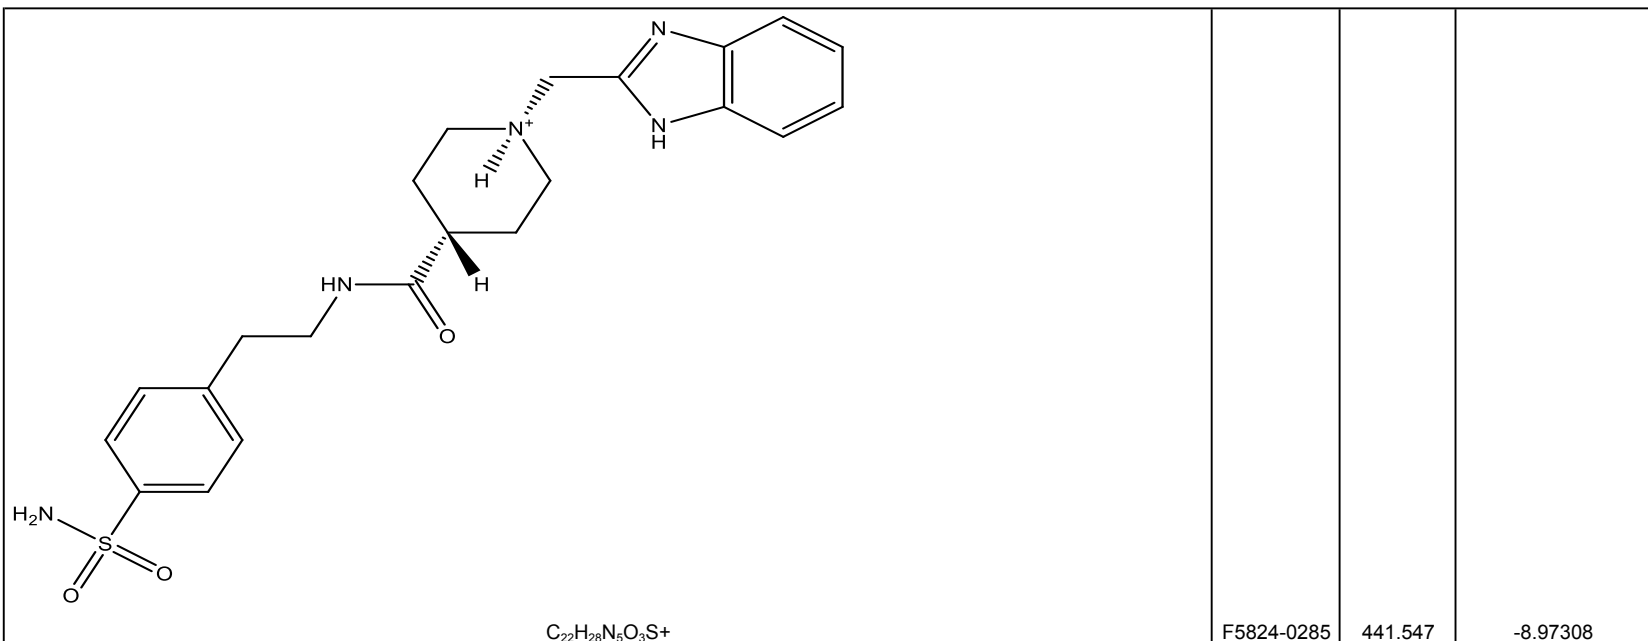

F5824-0285

441.547

-8.97308

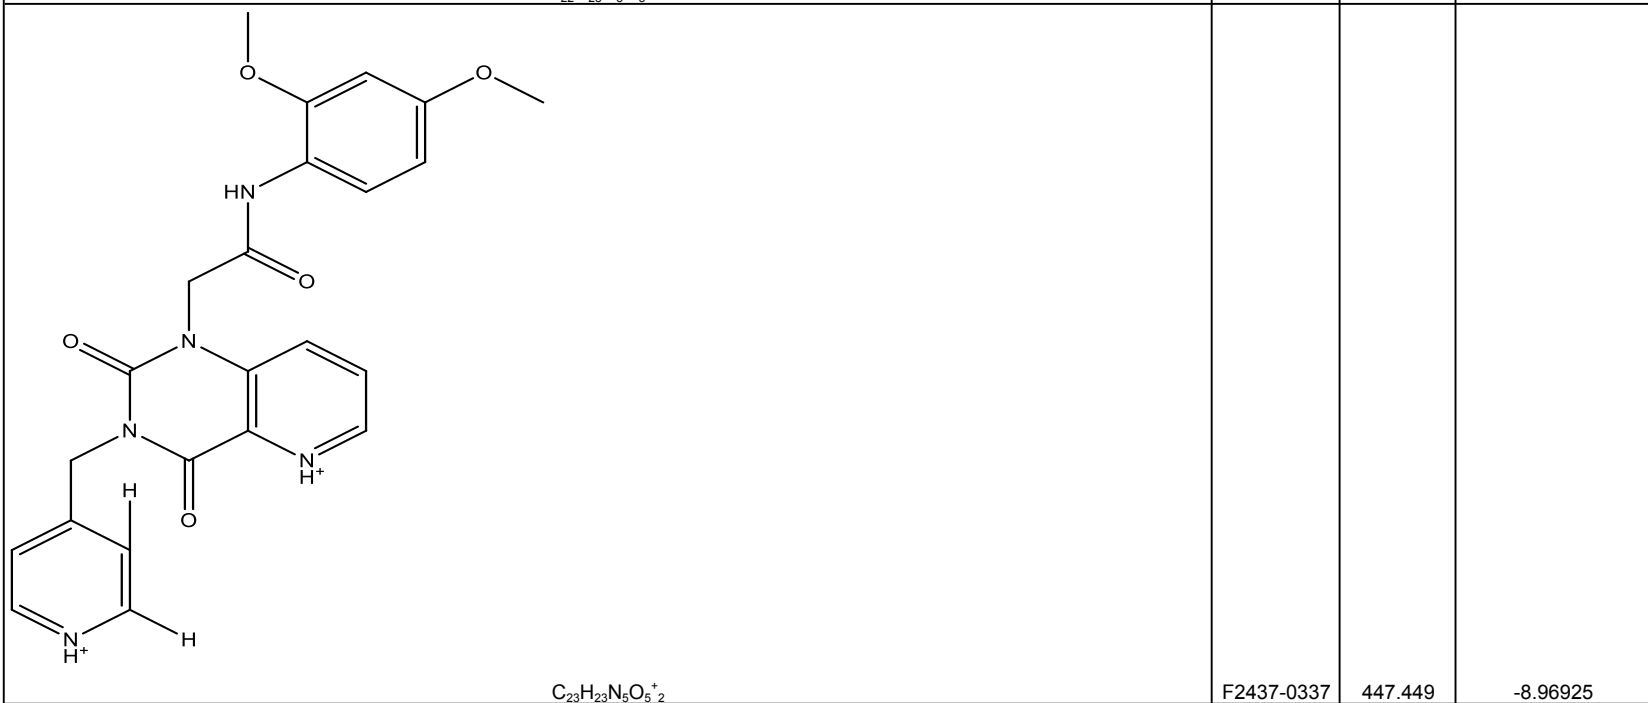

F2437-0337

447.449

-8.96925

|                                                                                                                                                                                                                                                                                                                                                                                                                                                                                                                                                                                 |            |         |          |
|---------------------------------------------------------------------------------------------------------------------------------------------------------------------------------------------------------------------------------------------------------------------------------------------------------------------------------------------------------------------------------------------------------------------------------------------------------------------------------------------------------------------------------------------------------------------------------|------------|---------|----------|
|  <p>Chemical structure of a piperazine derivative. The piperazine ring has a protonated nitrogen (NH<sup>+</sup>). One nitrogen is substituted with a 4-(acetamido)phenylsulfonamide group. The other nitrogen is substituted with a 1-hydroxyethyl chain, which is further substituted with a 4-(acetamido)phenoxy group. The hydroxyl group is shown with a dashed bond, and the hydrogen is shown with a wedged bond.</p>                                                                  | F3083-0348 | 490.573 | -8.84514 |
|  <p>Chemical structure of a complex heterocyclic molecule. It features a central five-membered ring with two carbonyl groups and a nitrogen atom. The nitrogen is substituted with a propyl chain ending in a pyridinium ring. The central ring also has a hydroxyl group and a thiazole ring attached. The pyridinium ring is shown with a protonated nitrogen (N<sup>+</sup>H).</p>                                                                                                        | F1260-0014 | 394.447 | -8.84232 |
|  <p>Chemical structure of a piperazine derivative. The piperazine ring has a protonated nitrogen (NH<sup>+</sup>). One nitrogen is substituted with a 2-hydroxyethyl chain. The other nitrogen is substituted with a 1-(4-methoxyphenyl)ethyl group. The 1-(4-methoxyphenyl)ethyl group is further substituted with a thiazole ring, which is in turn substituted with a benzamide group. The hydroxyl group is shown with a dashed bond, and the hydrogen is shown with a wedged bond.</p> | F1654-0100 | 479.636 | -8.82782 |

|                                                                                                                                                          |            |         |          |
|----------------------------------------------------------------------------------------------------------------------------------------------------------|------------|---------|----------|
| 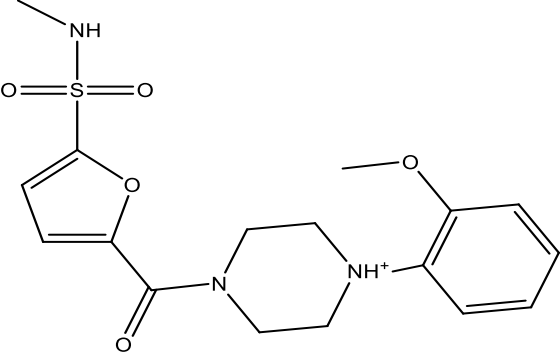 <p style="text-align: center;"><math>C_{17}H_{22}N_3O_5^+</math></p>   | F5570-0116 | 379.43  | -8.82107 |
|  <p style="text-align: center;"><math>C_{24}H_{30}FN_4O_5^+</math></p> | F2573-0380 | 472.515 | -8.81327 |
|  <p style="text-align: center;"><math>C_{22}H_{27}N_5O_3^+</math></p> | F5610-0224 | 407.471 | -8.81075 |



|                                                                                                                                                         |            |         |          |
|---------------------------------------------------------------------------------------------------------------------------------------------------------|------------|---------|----------|
| 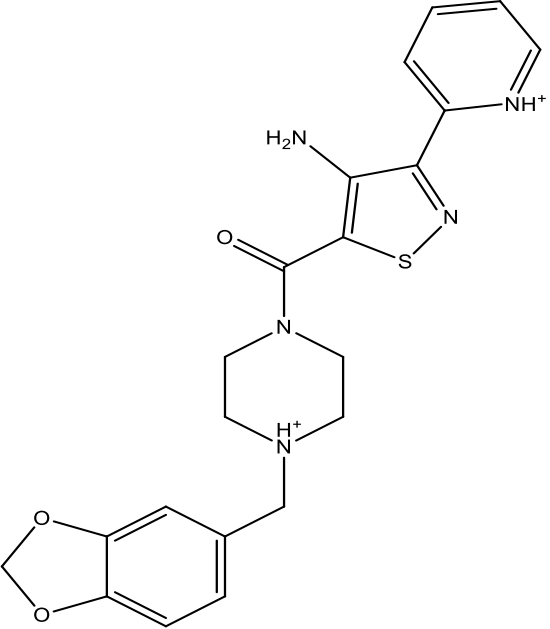 <p style="text-align: center;"><math>C_{21}H_{23}N_5O_3S^+</math></p> | F3406-4826 | 423.489 | -8.8097  |
|  <p style="text-align: center;"><math>C_{26}H_{30}N_4^+</math></p>    | F1116-0042 | 396.534 | -8.56082 |

|                                                                                                                                                                                                                                                                                                                                                                                                                                              |            |         |          |
|----------------------------------------------------------------------------------------------------------------------------------------------------------------------------------------------------------------------------------------------------------------------------------------------------------------------------------------------------------------------------------------------------------------------------------------------|------------|---------|----------|
|  <p>Chemical structure of a pyridine derivative. It features a pyridine ring with a methyl ketone group at the 2-position and a 3,4-dimethoxyphenyl group at the 4-position. The pyridine ring is connected via a methylene group to the nitrogen of a protonated piperazine ring, which also has a methyl ketone group attached to its other nitrogen.</p> | F2086-0521 | 458.513 | -8.3651  |
|  <p>Chemical structure of a morpholine derivative. It features a morpholine ring with a phenyl group attached to the carbon adjacent to the oxygen and a protonated nitrogen. The nitrogen is connected via a propyl chain to a secondary amide group, which is further attached to a tert-butyl group.</p>                                                | F5022-0125 | 304.431 | -8.36429 |

$C_{23}H_{31}N_4O_6^+$

F2086-0521

458.513

-8.3651

$C_{18}H_{29}N_2O_2^+$

F5022-0125

304.431

-8.36429

|                                                                                                                                                                                                                                                                                                                                                                                                                                                                                                                                                               |            |         |          |
|---------------------------------------------------------------------------------------------------------------------------------------------------------------------------------------------------------------------------------------------------------------------------------------------------------------------------------------------------------------------------------------------------------------------------------------------------------------------------------------------------------------------------------------------------------------|------------|---------|----------|
| 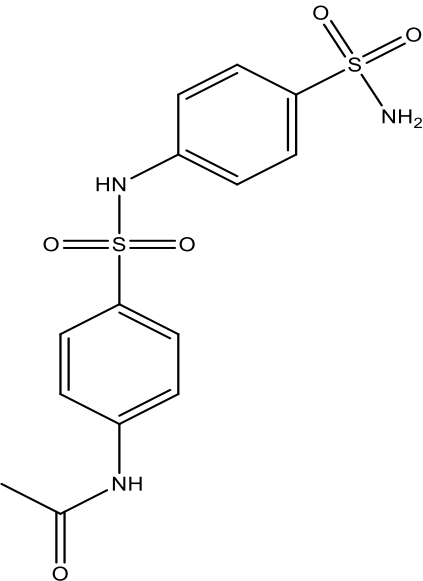 <p>Chemical structure showing a central benzene ring substituted with a sulfamoyl group (-SO<sub>2</sub>NH<sub>2</sub>) at the para position and an acetamide group (-NHCOCH<sub>3</sub>) at the other para position. This central ring is further substituted with another sulfamoyl group (-SO<sub>2</sub>NH-) at the para position, which is connected to another benzene ring with a sulfamoyl group (-SO<sub>2</sub>NH<sub>2</sub>) at the para position.</p>          | F3146-4688 | 369.41  | -8.35285 |
|  <p>Chemical structure showing a central benzene ring substituted with an acetamide group (-NHCOCH<sub>3</sub>) at the para position and a phenoxy group (-O-) at the other para position. The phenoxy group is connected to a propyl chain, which is further connected to a pyrrolidinium ring (a five-membered ring with a nitrogen atom and a positive charge) with a hydroxyl group (-OH) attached to the propyl chain.</p>                                            | F1288-0041 | 337.418 | -8.35031 |
|  <p>Chemical structure showing a central benzene ring substituted with a pyridinium group (a six-membered ring with a nitrogen atom and a positive charge) at the para position and a phenoxy group (-O-) at the other para position. The phenoxy group is connected to a propyl chain, which is further connected to a pyrrolidinium ring (a five-membered ring with a nitrogen atom and a positive charge) with a hydroxyl group (-OH) attached to the propyl chain.</p> | F0921-6479 | 310.312 | -8.34363 |

|                                                                                                                                                          |            |         |          |
|----------------------------------------------------------------------------------------------------------------------------------------------------------|------------|---------|----------|
| 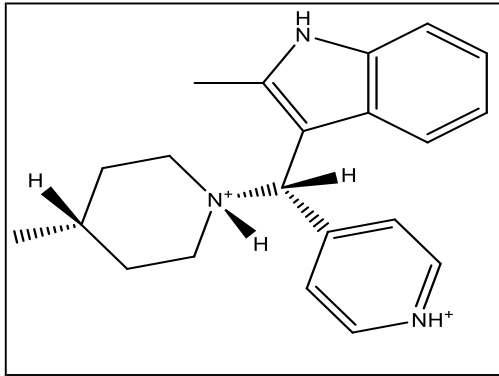 <p style="text-align: center;"><math>C_{21}H_{27}N_3^+</math></p>       | F1754-0062 | 319.449 | -8.32822 |
|  <p style="text-align: center;"><math>C_{21}H_{27}BrN_3O_3^+</math></p> | F0279-0039 | 476.372 | -8.31372 |
|  <p style="text-align: center;"><math>C_{31}H_{37}N_2O_4^+</math></p>  | F1757-0349 | 500.636 | -8.29808 |

|                                                                                                                                                                                                                                                                                                                      |                   |                |                 |
|----------------------------------------------------------------------------------------------------------------------------------------------------------------------------------------------------------------------------------------------------------------------------------------------------------------------|-------------------|----------------|-----------------|
| 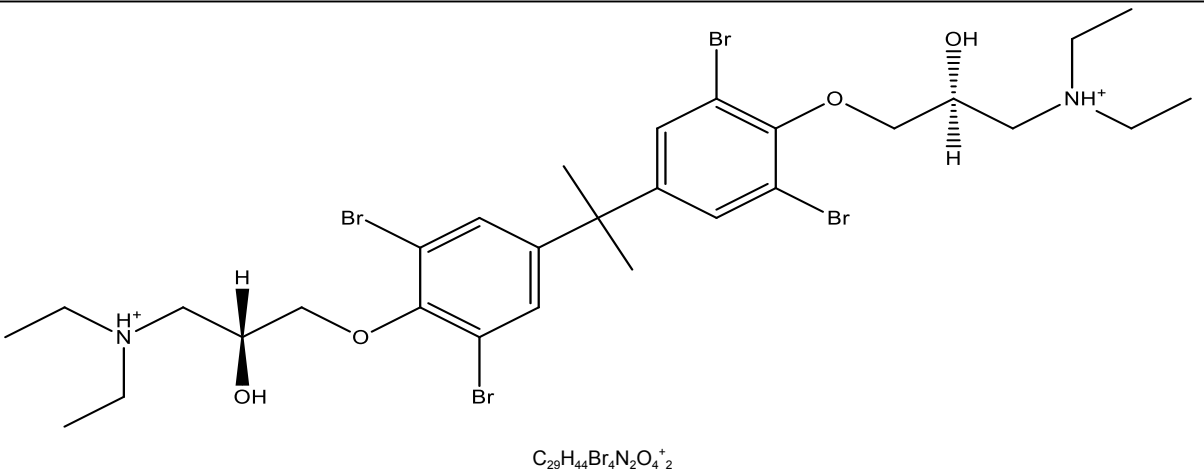 <p>Chemical structure of a complex organic cation. It features two propylammonium groups (NH<sup>+</sup>), two chiral hydroxyl groups (OH), and two 2,4,6-tribromophenyl rings connected by a central quaternary carbon atom.</p> | <p>F0191-0482</p> | <p>802.278</p> | <p>-8.29662</p> |
|  <p>Chemical structure of a complex organic cation. It features a benzodioxole ring system, a thiophene ring, and a pyrrolidinium ring. The structure includes an amide group, a hydroxyl group, and a methyl group.</p>          | <p>F0526-2298</p> | <p>429.447</p> | <p>-8.1324</p>  |
|  <p>Chemical structure of a complex organic cation. It features a bromophenyl ring, a quaternary ammonium group (N<sup>+</sup>), and two chiral hydroxyl groups (OH).</p>                                                        | <p>F3368-0296</p> | <p>362.263</p> | <p>-8.00463</p> |

|                                                                                                                                                            |            |        |          |
|------------------------------------------------------------------------------------------------------------------------------------------------------------|------------|--------|----------|
| 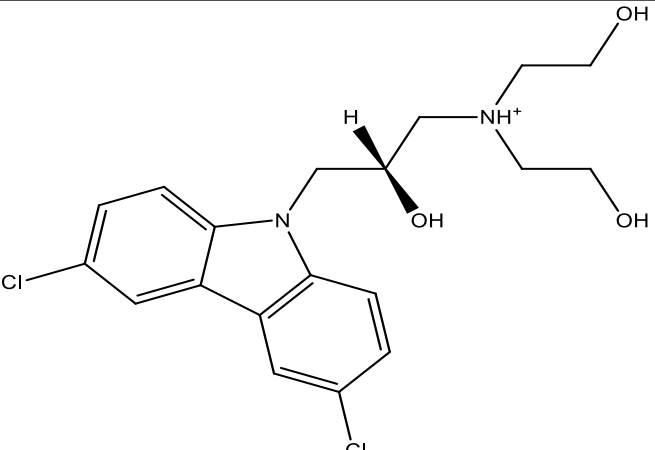 <p style="text-align: center;"><math>C_{19}H_{23}Cl_2N_2O_3^+</math></p> | F1021-0469 | 397.3  | -7.99601 |
|  <p style="text-align: center;"><math>C_{22}H_{26}N_5O_5^+</math></p>   | F5832-1558 | 439.47 | -7.99445 |
|  <p style="text-align: center;"><math>C_{16}H_{17}N_6O_5S^+</math></p> | F2599-0073 | 404.4  | -7.98104 |

|                                                                                    |                                                          |                |                 |
|------------------------------------------------------------------------------------|----------------------------------------------------------|----------------|-----------------|
| 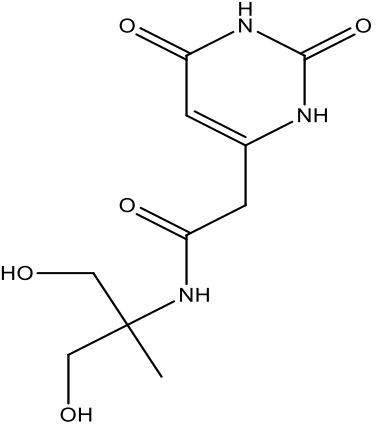  |                                                          |                |                 |
|  | <p><math>C_{10}H_{15}N_3O_5</math></p> <p>F1811-0086</p> | <p>257.246</p> | <p>-7.97796</p> |
| <p><math>C_{13}H_{23}N_3O_3S_2^+</math></p>                                        | <p>F2145-0053</p>                                        | <p>299.387</p> | <p>-7.95808</p> |

|                                                                                                                                                           |            |        |          |
|-----------------------------------------------------------------------------------------------------------------------------------------------------------|------------|--------|----------|
| 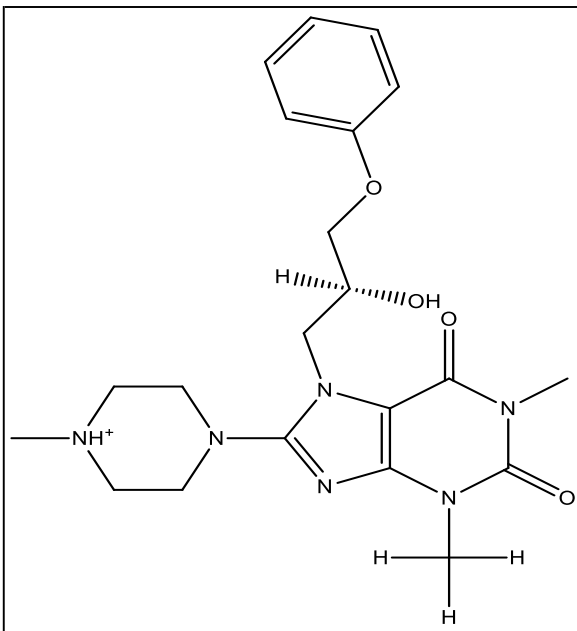 <p data-bbox="745 1112 861 1136"><math>C_{21}H_{29}N_6O_4^+</math></p> | F1532-0053 | 428.49 | -7.95542 |
|-----------------------------------------------------------------------------------------------------------------------------------------------------------|------------|--------|----------|



|                                                                                                                                                             |            |         |          |
|-------------------------------------------------------------------------------------------------------------------------------------------------------------|------------|---------|----------|
| 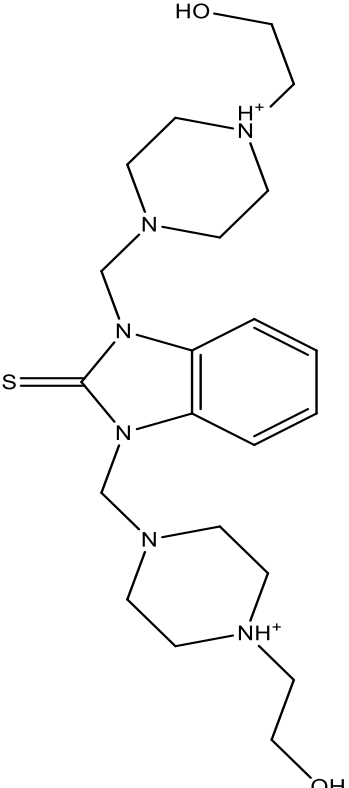 <p style="text-align: center;"><math>C_{21}H_{36}N_8O_2S^+_2</math></p>   | F0318-0282 | 434.599 | -7.89271 |
|  <p style="text-align: center;"><math>C_{22}H_{23}N_3O_3^+_2</math></p>   | F1190-0086 | 375.426 | -7.86714 |
|  <p style="text-align: center;"><math>C_{16}H_{17}N_5O_2S^+_2</math></p> | F0017-0327 | 341.387 | -7.84483 |

|                                                                                                                                                           |            |         |          |
|-----------------------------------------------------------------------------------------------------------------------------------------------------------|------------|---------|----------|
| 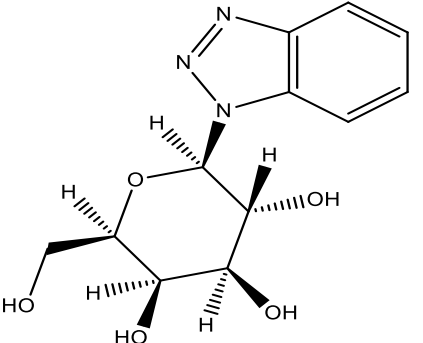 <p style="text-align: center;"><math>C_{12}H_{15}N_3O_5</math></p>      | F1586-0012 | 281.268 | -7.84021 |
|  <p style="text-align: center;"><math>C_{19}H_{18}ClN_4O_3^+</math></p> | F5230-0424 | 384.821 | -7.83133 |
|  <p style="text-align: center;"><math>C_{21}H_{18}FN_3O_2^+</math></p>  | F0842-0033 | 345.375 | -7.82659 |

|                                                                                                                                                           |            |         |          |
|-----------------------------------------------------------------------------------------------------------------------------------------------------------|------------|---------|----------|
| 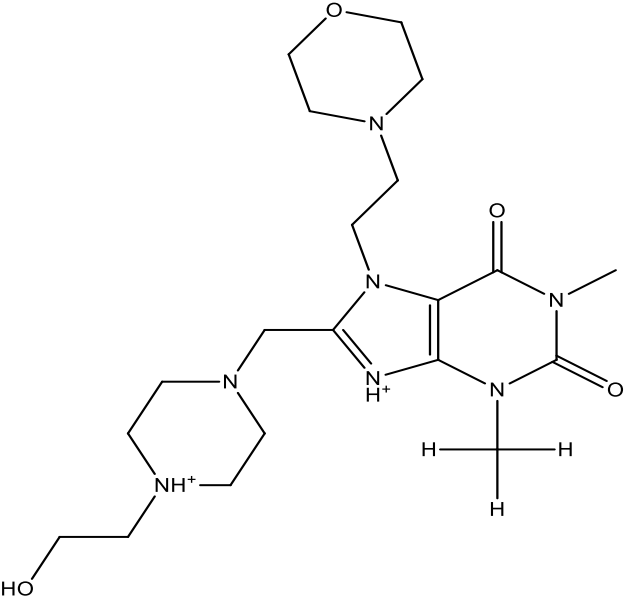 <p style="text-align: center;"><math>C_{20}H_{35}N_7O_4^+</math></p>    | F3001-0031 | 435.525 | -7.82324 |
|  <p style="text-align: center;"><math>C_{16}H_{13}ClN_3O_2^+</math></p> | F3367-0071 | 313.743 | -7.82045 |
|  <p style="text-align: center;"><math>C_{12}H_{15}NO_4S</math></p>     | F0792-0017 | 269.315 | -7.80005 |

|                                                                                                                                                         |            |         |          |
|---------------------------------------------------------------------------------------------------------------------------------------------------------|------------|---------|----------|
| 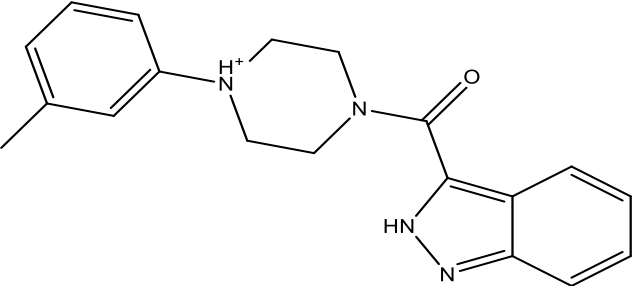 <p style="text-align: center;"><math>C_{19}H_{21}N_4O^+</math></p>    | F2491-0094 | 320.393 | -7.72486 |
|  <p style="text-align: center;"><math>C_{17}H_{17}N_6O_4^+</math></p> | F6036-0527 | 368.351 | -7.71068 |

|                                                                                    |                           |            |                     |
|------------------------------------------------------------------------------------|---------------------------|------------|---------------------|
| 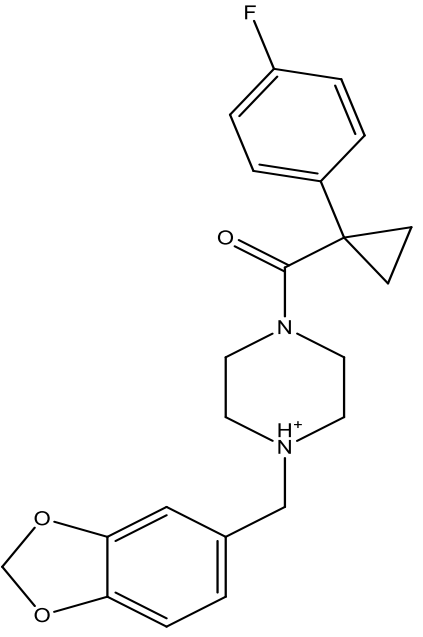  | $C_{22}H_{24}FN_2O_3^+$   | F5475-0141 | 382.434<br>-7.70698 |
|  | $C_{16}H_{21}N_2O_2S_2^+$ | F5020-0293 | 336.466<br>-7.7058  |

|                                                             |            |         |          |
|-------------------------------------------------------------|------------|---------|----------|
| <p style="text-align: center;"><chem>C18H15N2O5+</chem></p> | F0016-1291 | 338.319 | -7.65333 |
| <p style="text-align: center;"><chem>C24H35N6O2+</chem></p> | F2791-0376 | 438.572 | -7.65187 |

|                                                                                                                                                             |            |         |          |
|-------------------------------------------------------------------------------------------------------------------------------------------------------------|------------|---------|----------|
| 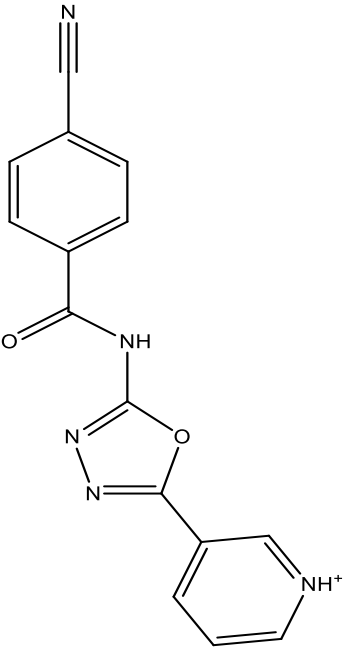 <p style="text-align: center;"><math>C_{15}H_{10}N_5O_2^+</math></p>      | F0608-0966 | 291.268 | -7.64774 |
|  <p style="text-align: center;"><math>C_{20}H_{31}N_6O_3^+</math></p>    | F5341-0209 | 402.495 | -7.63253 |
|  <p style="text-align: center;"><math>C_{21}H_{20}ClN_2O_3S^+</math></p> | F0365-0007 | 414.906 | -7.61774 |

|                                                                                                                                                         |            |         |          |
|---------------------------------------------------------------------------------------------------------------------------------------------------------|------------|---------|----------|
| 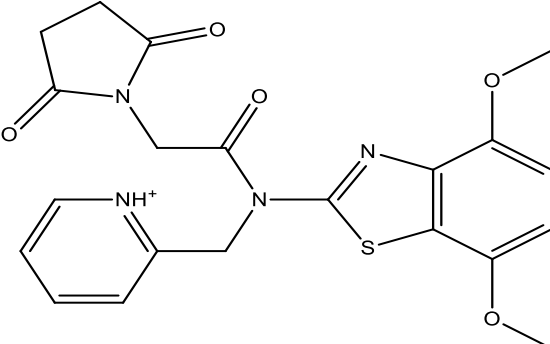 <p style="text-align: center;"><math>C_{21}H_{21}N_4O_5^+</math></p>  | F2738-2186 | 440.473 | -7.57112 |
|  <p style="text-align: center;"><math>C_{23}H_{24}N_3O_6^+</math></p> | F0779-0378 | 437.451 | -7.56945 |



|                                                                                                                                                            |            |         |          |
|------------------------------------------------------------------------------------------------------------------------------------------------------------|------------|---------|----------|
| 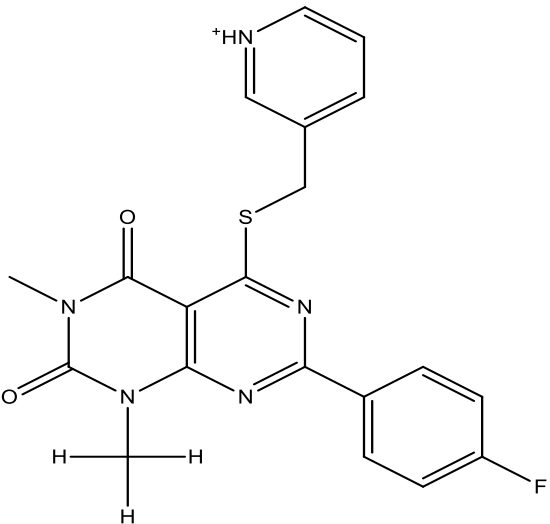 <p style="text-align: center;"><math>C_{20}H_{17}FN_5O_2S^+</math></p>   | F0654-1137 | 409.437 | -7.56566 |
|  <p style="text-align: center;"><math>C_{17}H_{27}N_2O_3^+</math></p>    | F1674-0038 | 306.404 | -7.56223 |
|  <p style="text-align: center;"><math>C_{18}H_{17}N_5O_4S_2</math></p> | F1809-0178 | 431.483 | -7.50545 |

|                                                                                     |  |  |  |
|-------------------------------------------------------------------------------------|--|--|--|
| 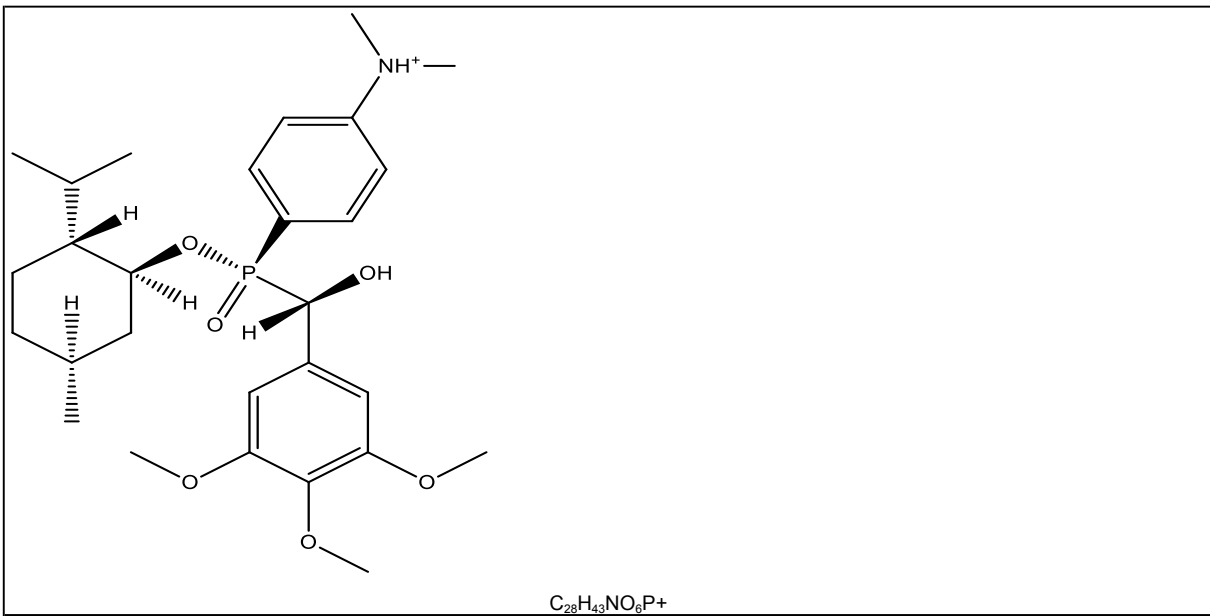  |  |  |  |
|  |  |  |  |

$C_{28}H_{43}NO_6P^+$

F1035-0048

519.617

-7.50025

$C_{24}H_{23}FN_3O_4S_2^+$

F2652-1571

499.574

-7.4991

|                                                                                     |            |         |          |
|-------------------------------------------------------------------------------------|------------|---------|----------|
| 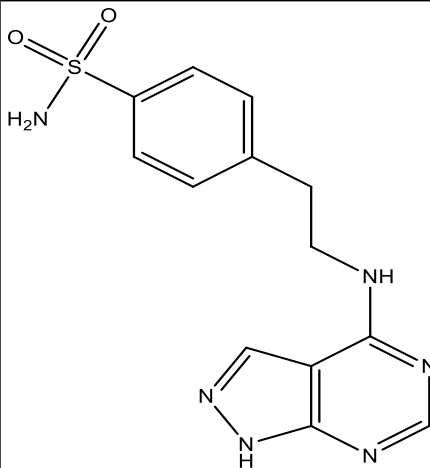   |            |         |          |
| $C_{13}H_{14}N_6O_2S$                                                               | F5285-0065 | 318.353 | -7.49879 |
|   |            |         |          |
| $C_{22}H_{24}FN_4O_2S^+$                                                            | F5106-0174 | 426.508 | -7.41305 |
|  |            |         |          |
| $C_{18}H_{30}N_5O_2^+$                                                              | F3124-1142 | 347.459 | -7.40247 |

|                                                                                                                                                                                                    |            |         |          |
|----------------------------------------------------------------------------------------------------------------------------------------------------------------------------------------------------|------------|---------|----------|
| 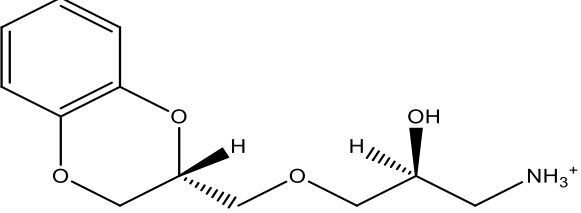 <p>Chemical structure of a benzodioxane derivative with a chiral center and an ammonium group.</p>               | F1276-0020 | 239.271 | -7.3783  |
|  <p>Chemical structure of a piperidine derivative with a chiral center and an amide group.</p>                    | F3263-0061 | 320.431 | -7.37717 |
|  <p>Chemical structure of a complex heterocyclic molecule with multiple nitrogen atoms and a hydroxyl group.</p> | F3188-0108 | 305.333 | -7.35866 |
|  <p>Chemical structure of a pyridine derivative with a chiral center and a protonated nitrogen.</p>             | F5868-0059 | 230.226 | -7.27407 |

|                                                                                                                                                   |            |         |          |
|---------------------------------------------------------------------------------------------------------------------------------------------------|------------|---------|----------|
| 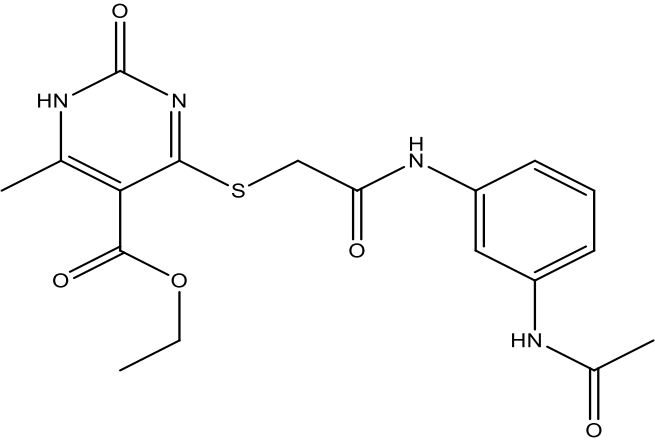 <p style="text-align: center;"><chem>C18H20N4O5S</chem></p>     | F2800-0048 | 404.44  | -7.27115 |
|  <p style="text-align: center;"><chem>C23H21FN3O2S2+</chem></p> | F2742-0080 | 453.548 | -7.22024 |
|  <p style="text-align: center;"><chem>C10H16NO3+</chem></p>    | F2167-0160 | 197.233 | -7.21548 |

|                                                                                                                                                            |            |         |          |
|------------------------------------------------------------------------------------------------------------------------------------------------------------|------------|---------|----------|
| 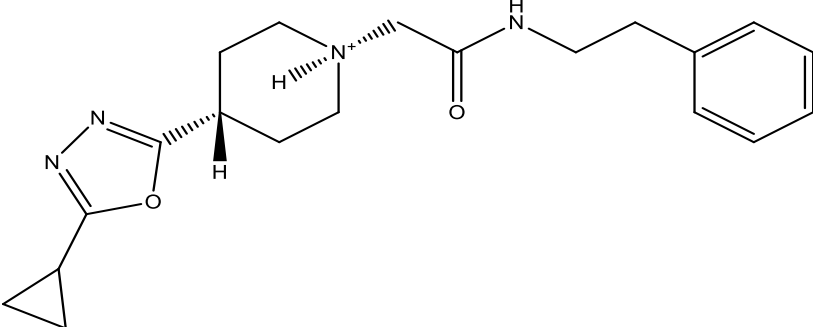 <p style="text-align: center;"><math>C_{20}H_{27}N_4O_2^+</math></p>    | F5596-1295 | 354.451 | -7.14968 |
|  <p style="text-align: center;"><math>C_{11}H_{14}N_3^+</math></p>        | F1558-0185 | 187.244 | -7.14291 |
|  <p style="text-align: center;"><math>C_{18}H_{22}N_3O_6S_2^+</math></p> | F5293-0621 | 403.467 | -7.13037 |

|                                                                                                                                                           |            |         |          |
|-----------------------------------------------------------------------------------------------------------------------------------------------------------|------------|---------|----------|
| 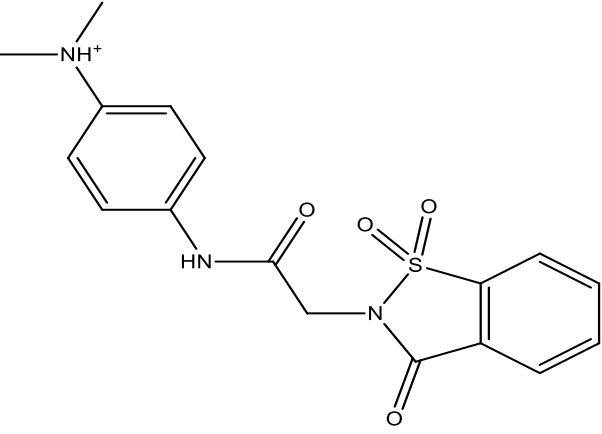 <p style="text-align: center;"><math>C_{17}H_{18}N_3O_4^+</math></p>    | F2748-0144 | 359.399 | -6.99149 |
|  <p style="text-align: center;"><math>C_{20}H_{17}N_4OS^+</math></p>    | F3183-0024 | 360.433 | -6.96159 |
|  <p style="text-align: center;"><math>C_{25}H_{31}N_4O_3^+</math></p> | F0675-0456 | 434.537 | -6.95894 |

|                                                                                                                                                                                                                                                                                                                                                                                                                                                                                                                                 |            |         |          |
|---------------------------------------------------------------------------------------------------------------------------------------------------------------------------------------------------------------------------------------------------------------------------------------------------------------------------------------------------------------------------------------------------------------------------------------------------------------------------------------------------------------------------------|------------|---------|----------|
|  <p>Chemical structure of a complex organic molecule. It features a piperazine ring system connected to a pyrrolidinium ring. The pyrrolidinium ring is substituted with a hydrogen atom (H) and a hydrogen atom (H) on the nitrogen atom. The piperazine ring is substituted with a hydrogen atom (H) and a hydrogen atom (H) on the nitrogen atom. The molecule also contains a dipeptide chain with a benzene ring and a methyl group.</p> | F2291-0802 | 478.593 | -11.5512 |
|  <p>Chemical structure of a complex organic molecule. It features a furfurylamine derivative (2-(furfurylamino)ethanol) connected to a dipeptide chain. The dipeptide chain consists of a benzene ring and a methyl group. The molecule also contains a hydroxyl group (OH) and a hydrogen atom (H) on the nitrogen atom.</p>                                                                                                                 | F1011-0671 | 416.473 | -10.8452 |
|  <p>Chemical structure of a complex organic molecule. It features a sulfonamide group (SO<sub>2</sub>NH<sub>2</sub>) connected to a pyrazole ring. The pyrazole ring is substituted with a methyl group (CH<sub>3</sub>) and a methoxy group (OCH<sub>3</sub>). The molecule also contains a chlorine atom (Cl) and a hydrogen atom (H) on the nitrogen atom.</p>                                                                            | F5015-0105 | 444.892 | -10.8379 |
|  <p>Chemical structure of a complex organic molecule. It features a piperazine ring system connected to a dipeptide chain. The dipeptide chain consists of a benzene ring and a sulfonamide group (SO<sub>2</sub>NH<sub>2</sub>). The molecule also contains a furfurylamine derivative (2-(furfurylamino)ethanol) and a hydrogen atom (H) on the nitrogen atom.</p>                                                                        | F2504-0043 | 450.509 | -10.8271 |



|                                                                                                                                                                                                                                                                                                                                                                                                                                                                                                                                                                                                              |            |         |          |
|--------------------------------------------------------------------------------------------------------------------------------------------------------------------------------------------------------------------------------------------------------------------------------------------------------------------------------------------------------------------------------------------------------------------------------------------------------------------------------------------------------------------------------------------------------------------------------------------------------------|------------|---------|----------|
| 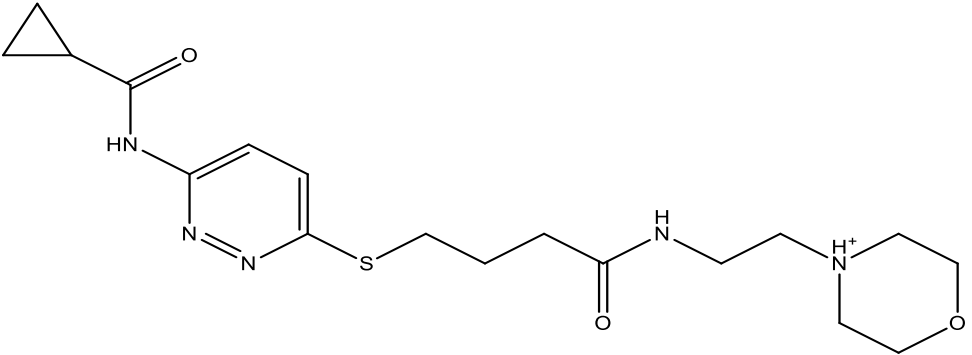 <p>Chemical structure of a cationic molecule. It features a cyclopropyl group attached to a carbonyl group, which is linked to a pyridine ring. The pyridine ring is connected via a propyl chain to another carbonyl group, which is further linked to a morpholinium ring (a six-membered ring with one oxygen and one positively charged nitrogen).</p>                                                                                                                                                                | F5248-0457 | 393.503 | -10.5904 |
|  <p>Chemical structure of a cationic molecule. It consists of a dimethylsulfonamide group attached to a benzene ring. The benzene ring is connected via a propyl chain to a pyrimidine ring, which is further connected to an imidazolium ring (a five-membered ring with two nitrogens, one of which is positively charged).</p>                                                                                                                                                                                          | F5607-0142 | 443.523 | -10.5097 |
|  <p>Chemical structure of a cationic molecule. It features a pyridinium ring (a six-membered ring with one nitrogen, which is positively charged) attached to a carbon atom. This carbon atom is also bonded to a hydroxyl group and a methyl group. The carbon atom is further connected to a morpholine ring (a six-membered ring with one oxygen and one nitrogen). The morpholine ring is connected via a propyl chain to a dimethylammonium group (a nitrogen atom with two methyl groups and a positive charge).</p> | F3226-2219 | 425.483 | -10.4983 |

|                                                                                                                                                             |            |         |          |
|-------------------------------------------------------------------------------------------------------------------------------------------------------------|------------|---------|----------|
| 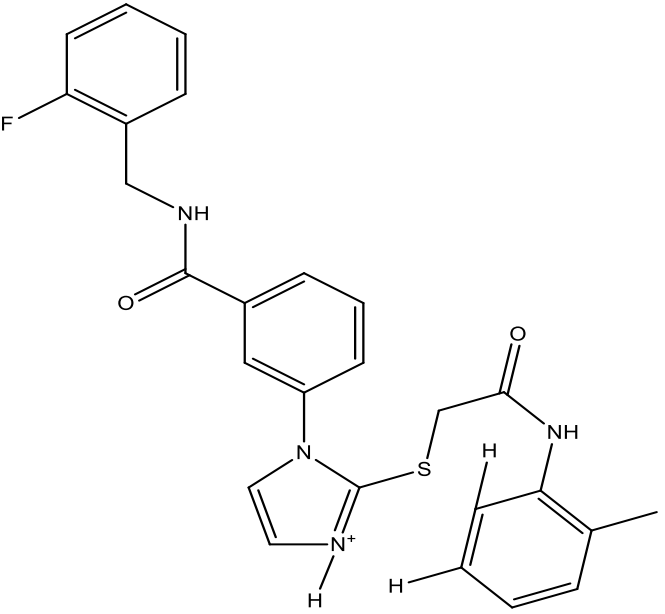 <p style="text-align: center;"><math>C_{26}H_{24}FN_4O_2S^+</math></p>    | F3406-0664 | 474.552 | -10.4412 |
|  <p style="text-align: center;"><math>C_{23}H_{18}N_4O_6S_2^+</math></p> | F1719-0016 | 508.523 | -10.4117 |
|  <p style="text-align: center;"><math>C_{15}H_{18}N_4O_3^+</math></p>    | F2721-0588 | 300.316 | -10.4114 |

|                                                                       |            |         |          |
|-----------------------------------------------------------------------|------------|---------|----------|
| <p style="text-align: center;"><math>C_{14}H_{16}N_3O_4^+</math></p>  | F3177-0040 | 289.29  | -10.3289 |
| <p style="text-align: center;"><math>C_{18}H_{25}N_6O_5^+</math></p>  | F1064-0133 | 404.425 | -9.92186 |
| <p style="text-align: center;"><math>C_{23}H_{28}FN_4O_4^+</math></p> | F2672-0363 | 442.489 | -9.66921 |

|                                                                                                                                                            |            |         |          |
|------------------------------------------------------------------------------------------------------------------------------------------------------------|------------|---------|----------|
| 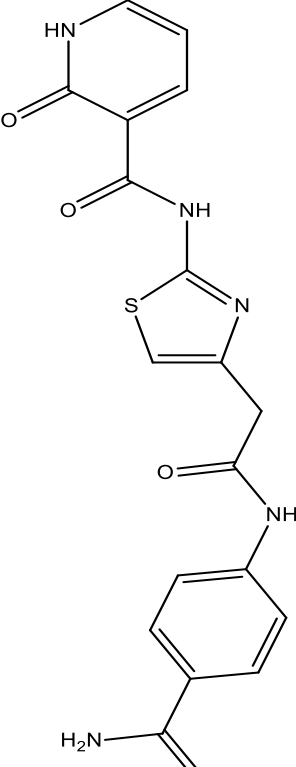 <p style="text-align: center;"><math>C_{18}H_{15}N_5O_4S</math></p>     | F5008-0250 | 397.408 | -9.66661 |
|  <p style="text-align: center;"><math>C_{19}H_{18}F_3N_6O^+</math></p> | F5258-0089 | 402.378 | -9.6525  |

|                                                                                                                                                                                                                                                                                                                                                                                                                                                                 |  |  |  |
|-----------------------------------------------------------------------------------------------------------------------------------------------------------------------------------------------------------------------------------------------------------------------------------------------------------------------------------------------------------------------------------------------------------------------------------------------------------------|--|--|--|
|  <p>Chemical structure of a complex organic cation, likely a neurotransmitter or drug derivative. The structure shows a central benzene ring substituted with a methyl group and a 2-amino-5-(pyridin-2-ylmethyl)phenyl group. The 2-amino group is further substituted with a benzamide chain, which is terminated by a protonated piperazine ring.</p>                       |  |  |  |
|  <p>Chemical structure of a complex organic cation, likely a neurotransmitter or drug derivative. The structure shows a central benzene ring substituted with a methyl group and a 2-(3,4,5-trimethoxyphenyl)acetyl group. The 2-(3,4,5-trimethoxyphenyl)acetyl group is further substituted with a benzamide chain, which is terminated by a protonated piperazine ring.</p> |  |  |  |

$C_{28}H_{31}N_7O_2^+$

F9995-0193

479.583

-9.60481

$C_{26}H_{31}N_2O_6^+$

F3385-3143

454.522

-9.42678

|                                                                                                                                                         |            |         |          |
|---------------------------------------------------------------------------------------------------------------------------------------------------------|------------|---------|----------|
| 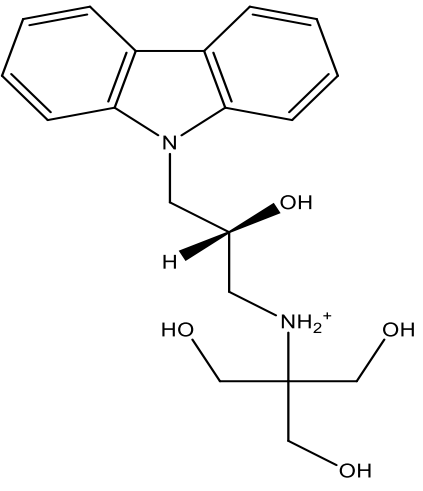 <p style="text-align: center;"><math>C_{19}H_{25}N_2O_4^+</math></p>  | F1407-0377 | 344.41  | -9.42633 |
|  <p style="text-align: center;"><math>C_{18}H_{30}N_6O_4^+</math></p> | F3064-0211 | 392.457 | -9.39895 |

|                                                                                    |            |         |          |
|------------------------------------------------------------------------------------|------------|---------|----------|
| 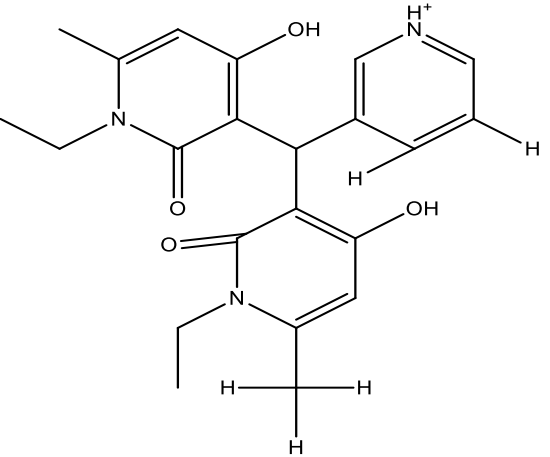  |            |         |          |
|  | F2811-0088 | 395.457 | -9.394   |
|  | F5097-2237 | 373.469 | -9.38166 |

$C_{22}H_{26}N_3O_4^+$

$C_{19}H_{24}N_3O_3S^+$

|                                                                                                                                                          |            |         |          |
|----------------------------------------------------------------------------------------------------------------------------------------------------------|------------|---------|----------|
| 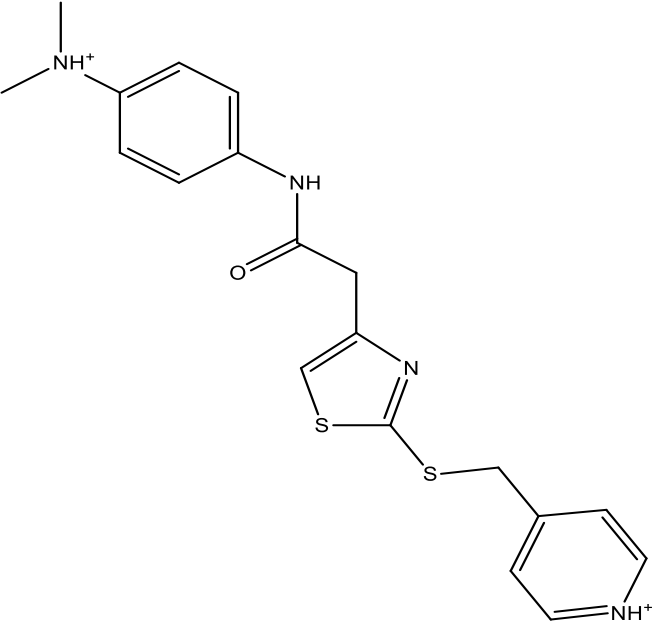 <p style="text-align: center;"><math>C_{19}H_{22}N_4OS_2^+</math></p>  | F5282-0068 | 384.513 | -9.07685 |
|  <p style="text-align: center;"><math>C_{24}H_{31}N_2O_5^+</math></p> | F1021-0722 | 426.511 | -8.9507  |



|                                                                                                                                                         |            |         |          |
|---------------------------------------------------------------------------------------------------------------------------------------------------------|------------|---------|----------|
| 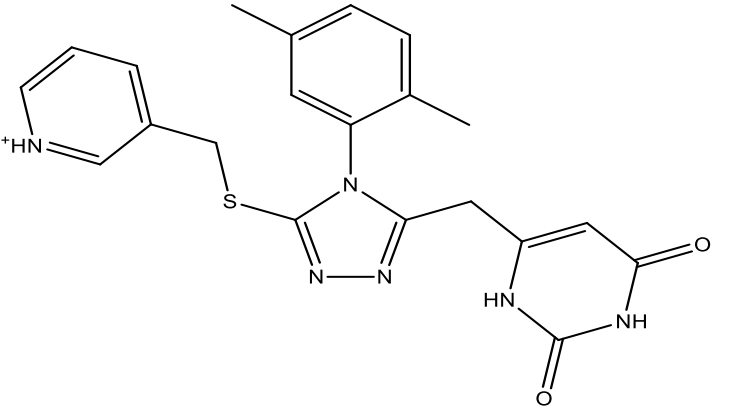 <p style="text-align: center;"><math>C_{21}H_{21}N_6O_2S^+</math></p> | F0648-0329 | 420.488 | -8.94256 |
|  <p style="text-align: center;"><math>C_{31}H_{32}N_4O_8</math></p>  | F0922-0900 | 588.616 | -8.84854 |

|                                                                                                                                                            |            |         |          |
|------------------------------------------------------------------------------------------------------------------------------------------------------------|------------|---------|----------|
|  <p style="text-align: center;"><math>C_{20}H_{18}N_4O_6S_2</math></p>    | F3109-0096 | 474.505 | -8.58599 |
|  <p style="text-align: center;"><math>C_{20}H_{17}N_4O_3S_2^+</math></p> | F0695-0031 | 424.491 | -8.05125 |

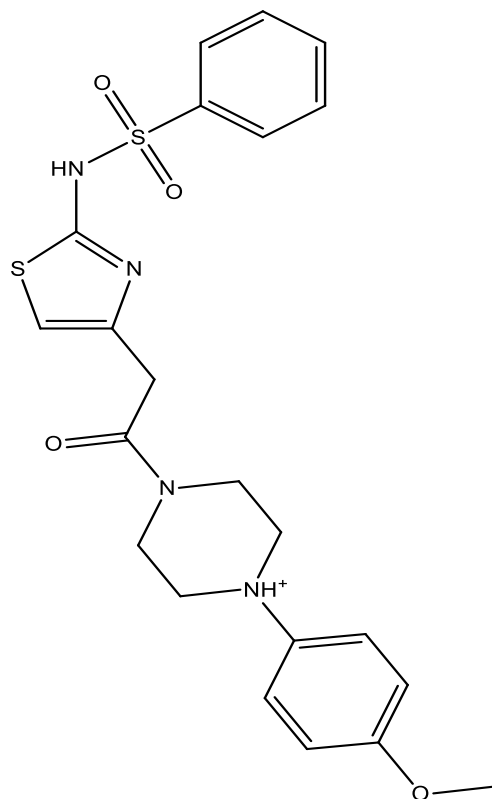

$C_{22}H_{25}N_4O_4S_2^+$

F2322-0789

472.576

-7.58102

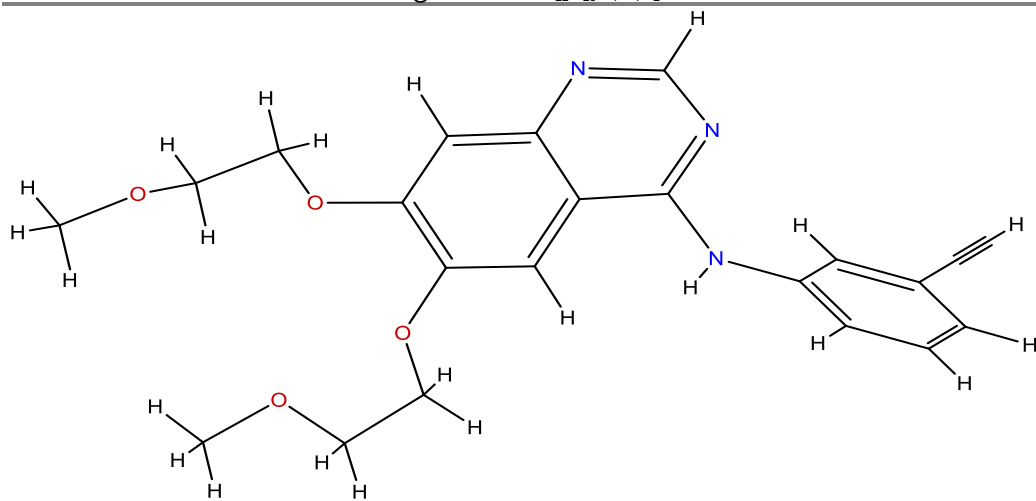

$C_{22}H_{23}N_3O_4$

ERLOTINIB 393.43572
