# Supplementary material
Source: PubMed Central journal article supplement (PMC4451962)
Supplement: 12885_2015_1415_MOESM7_ESM.pdf [file 12885_2015_1415_MOESM7_ESM.pdf]

| ID         | STRUCTURE                                                                                                                                                                | HIT CLASS | DECREASE EGFR pY1173 | DECREASE pERK | VIABILITY ASSAY SCC61   | VIABILITY ASSAY A431     |
|------------|--------------------------------------------------------------------------------------------------------------------------------------------------------------------------|-----------|----------------------|---------------|-------------------------|--------------------------|
| F0922-0900 | 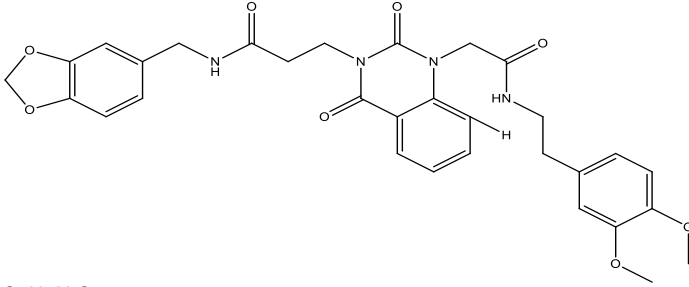<br><chem>C<sub>31</sub>H<sub>32</sub>N<sub>4</sub>O<sub>8</sub></chem>                 | 1         | S.S.                 | N.S.          | N.S.                    | N.S.                     |
| F2599-0073 | <br><chem>C<sub>16</sub>H<sub>17</sub>N<sub>6</sub>O<sub>5</sub>S<sup>+</sup></chem>    | 1         | --                   | --            | N.S.                    | N.S.                     |
| F3385-3143 | <br><chem>C<sub>26</sub>H<sub>31</sub>N<sub>2</sub>O<sub>6</sub><sup>+</sup></chem>    | 1         | N.S.                 | N.S.          | N.S.                    | INCREASE VIABILITY ALONE |
| F2145-0053 | <br><chem>C<sub>13</sub>H<sub>23</sub>N<sub>3</sub>O<sub>3</sub>S<sup>2+</sup></chem> | 1         | N.S.                 | N.S.          | INCREASE VIABILITY +CTX | N.S.                     |
| F5475-0141 | <br><chem>C<sub>22</sub>H<sub>24</sub>FN<sub>2</sub>O<sub>3</sub><sup>+</sup></chem>  | 1         | N.S.                 | N.S.          | N.S.                    | N.S.                     |

Suppl Table 2. Class 1= reduces pits in presence of EGF; Class 2 = increases pits in the presence of EGF; Class 4 = increases pits in the absence of EGF. SS=statistically significant; NS=not significant; -- =not determined.

|            |                                                                                                                  |   |      |                                      |                                   |                         |
|------------|------------------------------------------------------------------------------------------------------------------|---|------|--------------------------------------|-----------------------------------|-------------------------|
| F3406-0664 | 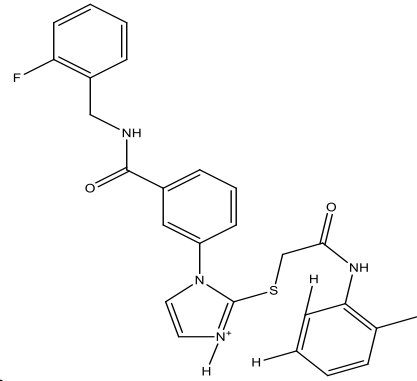<br><chem>C26H24FN4O2S+</chem>   | 1 | --   | --                                   | N.S.                              | N.S.                    |
| F1260-0014 | <br><chem>C20H20N4O3S2+</chem>  | 1 | --   | --                                   | N.S.                              | N.S.                    |
| F2738-2186 | <br><chem>C21H21N4O5S+</chem>   | 2 | S.S. | N.S.                                 | DECREASE VIABILITY ALL CONDITIONS | N.S.                    |
| F2573-0380 | <br><chem>C24H30FN4O5+</chem>  | 2 | N.S. | S.S.<br>(increase in absence of EGF) | N.S.                              | N.S.                    |
| F3109-0096 | <br><chem>C20H18N4O6S2</chem> | 4 | N.S. | N.S.                                 | N.S.                              | DECREASE VIABILITY +ERL |

Suppl Table 2. Class 1= reduces pits in presence of EGF; Class 2 = increases pits in the presence of EGF; Class 4 = increases pits in the absence of EGF. SS=statistically significant; NS=not significant; -- =not determined.

|            |                                                                                                                 |   |    |    |                            |                            |
|------------|-----------------------------------------------------------------------------------------------------------------|---|----|----|----------------------------|----------------------------|
| F0654-1137 | 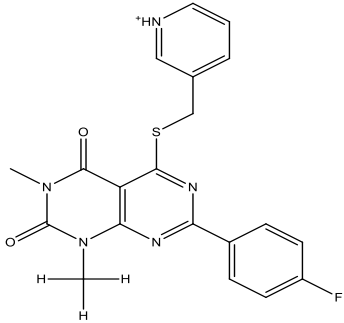<br><chem>C20H17FN5O2S+</chem>  | 4 | -- | -- | N.S.                       | N.S.                       |
| F5230-0424 | <br><chem>C19H18ClN4O3+</chem> | 4 | -- | -- | DECREASE<br>VIABILITY +ERL | N.S.                       |
| F3263-0061 | <br><chem>C18H29N2O3+</chem>   | 4 | -- | -- | N.S.                       | DECREASE<br>VIABILITY +ERL |
| F5253-0138 | <br><chem>C19H25N4O4S+</chem> | 4 | -- | -- | N.S.                       | N.S.                       |

Suppl Table 2. Class 1= reduces pits in presence of EGF; Class 2 = increases pits in the presence of EGF; Class 4 = increases pits in the absence of EGF. SS=statistically significant; NS=not significant; -- =not determined.
